# Supplementary material
Source: publisher figshare collection journal article supplement (https://acs.figshare.com/ndownloader/files/3788677)
Supplement: Supplementary file 1 [file 3788677]

# Modeling protein-micelle systems in implicit water

Rodney E. Versace and Themis Lazaridis\*

Department of Chemistry, The City College of New York,

160 Convent Avenue, New York, New York 10031

## SUPPORTING INFORMATION

**Table S1.** Average RMSD values from three independent 5-ns simulations

| Micelle System | Protein Name | RMSD (Å)<br>run 1 | RMSD (Å)<br>run 2 | RMSD (Å)<br>run 3 |
|----------------|--------------|-------------------|-------------------|-------------------|
| DPC            | Magainin 2   | 1.2 ± 0.3         | 1.1 ± 0.3         | 1.1 ± 0.3         |
|                | ARP1         | 1.2 ± 0.2         | 1.3 ± 0.3         | 1.2 ± 0.2         |
|                | GP41         | 1.6 ± 0.4         | 1.7 ± 0.4         | 1.0 ± 0.4         |
| SDS            | Magainin 2   | 1.0 ± 0.2         | 1.0 ± 0.2         | 1.0 ± 0.2         |
|                | ARP1         | 1.2 ± 0.2         | 1.2 ± 0.3         | 1.2 ± 0.3         |

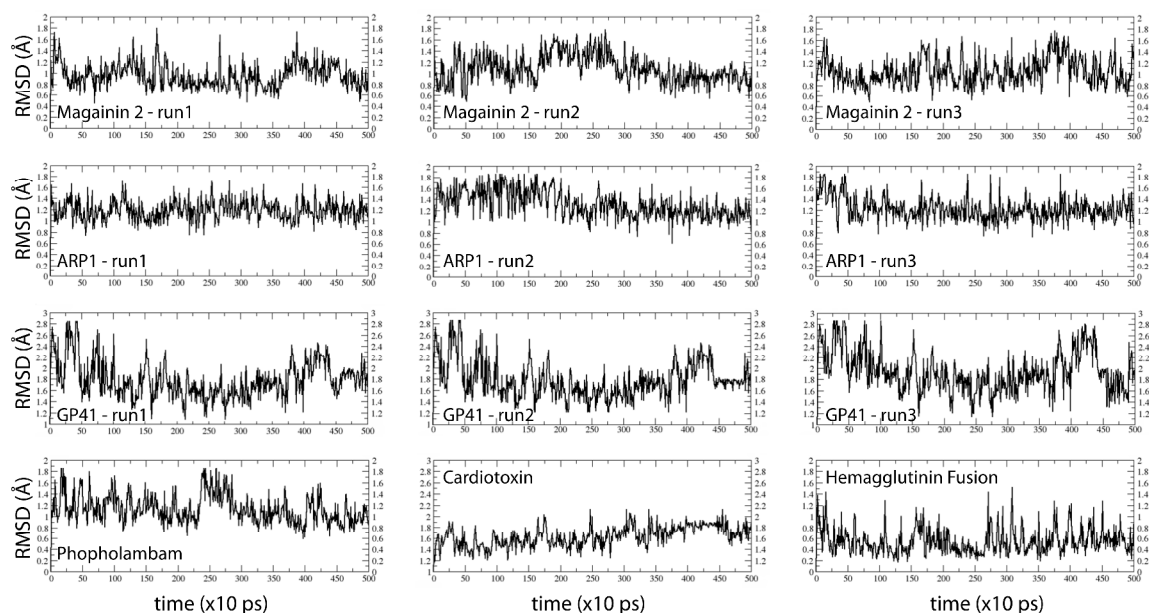

**Figure S1.** Time evolution of the RMSD value of the protein against its NMR structure for 5 ns in DPC micelles.

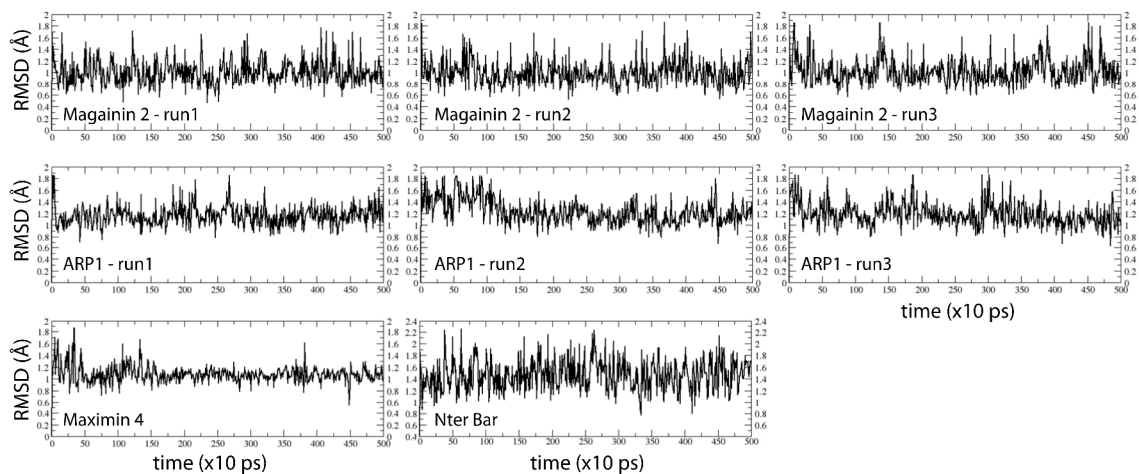

**Figure S2.** Time evolution of the RMSD value of the protein against its NMR structure for 5 ns in SDS micelles.

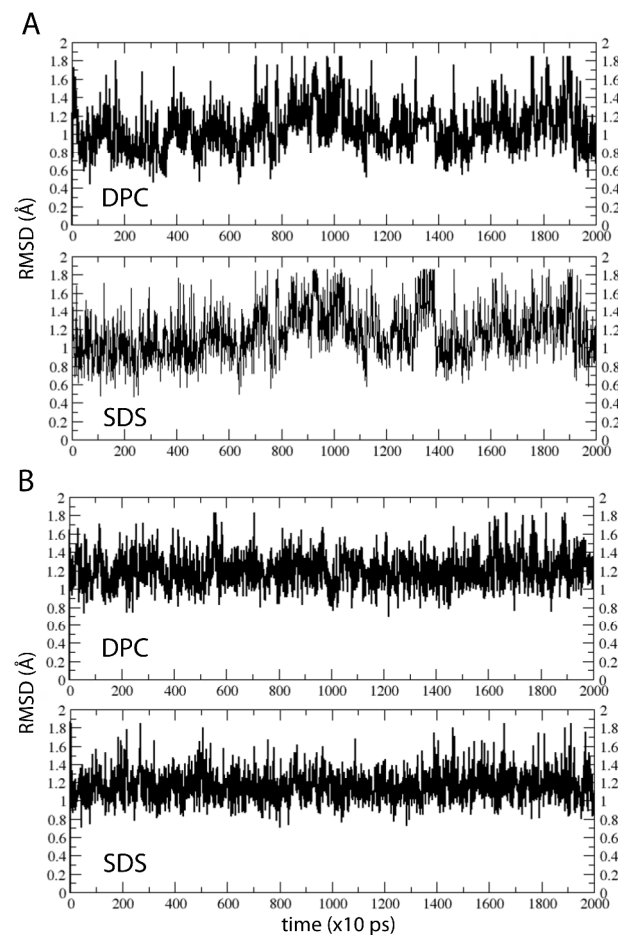

**Figure S3.** Time evolution of the RMSD value of the protein A) Magainin 2 and B) ARP1 against their respective NMR structure for 20 ns in DPC and SDS micelles.
